# Supplementary material for: Short-Term Pain Evolution and Treatment Success of Pulpotomy as Irreversible Pulpitis Permanent Treatment: A Non-Randomized Clinical Study
Source: MDPI journal article supplement (doi:10.3390/jcm11030787), 2022-01-31
Supplement: s1 [file s1]

## SUPPLEMENTARY MATERIALS

Practitioner pain scale

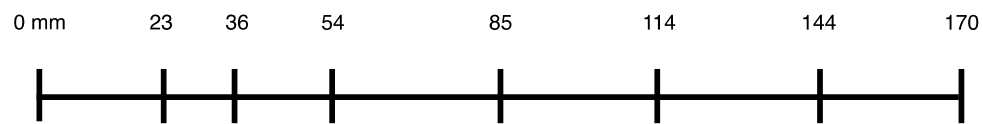

Patient pain scale

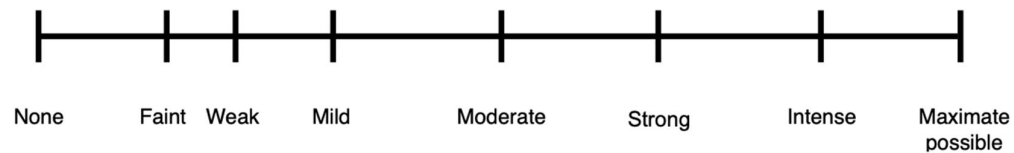

**Figure S1.** Practitioner and patient pain scales

**Table S1.** Detailed follow-up evaluation for each patient in *test* group (NA: non applicable, clinical failure < 12 months)

| Patient Code | Global Follow-up (months) | Clinical Success | Initial PAI score | Final PAI score | Global treatment success |
|--------------|---------------------------|------------------|-------------------|-----------------|--------------------------|
| P002         | 56                        | Yes              | 1                 | 1               | Yes                      |
| P003         | 55                        | Yes              | 2                 | 1               | Yes                      |
| P008         | 48                        | Yes              | 1                 | 1               | Yes                      |
| P009         | 48                        | Yes              | 2                 | 2               | Yes                      |
| P010         | 47                        | Yes              | 1                 | 2               | Yes                      |
| P014         | 46                        | Yes              | 2                 | 1               | Yes                      |
| P005         | 45                        | Yes              | 1                 | 1               | Yes                      |
| P015         | 42                        | Yes              | 1                 | 1               | Yes                      |
| P022         | 37                        | Yes              | 1                 | 1               | Yes                      |
| P023         | 36                        | Yes              | 2                 | 1               | Yes                      |
| P001         | 34                        | Yes              | 1                 | 1               | Yes                      |
| P013         | 34                        | No               | 1                 | 3               | No                       |
| P007         | 29                        | Yes              | 1                 | 1               | Yes                      |
| P029         | 29                        | Yes              | 3                 | 2               | Yes                      |
| P034         | 26                        | Yes              | 1                 | 2               | Yes                      |
| P035         | 26                        | Yes              | 1                 | 1               | Yes                      |
| P039         | 24                        | Yes              | 1                 | 2               | Yes                      |
| P042         | 24                        | Yes              | 1                 | 2               | Yes                      |
| P041         | 23                        | Yes              | 1                 | 1               | Yes                      |
| P012         | 21                        | Yes              | 1                 | 1               | Yes                      |

|      |    |     |   |    |     |
|------|----|-----|---|----|-----|
| P043 | 20 | Yes | 1 | 4  | No  |
| P045 | 20 | Yes | 3 | 2  | Yes |
| P046 | 20 | Yes | 2 | 2  | Yes |
| P049 | 16 | Yes | 2 | 1  | Yes |
| P050 | 16 | Yes | 2 | 2  | Yes |
| P051 | 16 | Yes | 3 | 2  | Yes |
| P047 | 14 | No  | 1 | 2  | No  |
| P053 | 13 | Yes | 2 | 1  | Yes |
| P057 | 13 | Yes | 2 | 1  | Yes |
| P054 | 12 | No  | 2 | 2  | No  |
| P056 | 12 | Yes | 1 | 1  | Yes |
| P040 | 2  | No  | 2 | NA | No  |
| P011 | 1  | No  | 3 | NA | No  |
| P028 | 1  | No  | 2 | NA | No  |
| P036 | 1  | No  | 2 | NA | No  |

**Table S2.** Detailed follow-up evaluation for each patient in *control* group (NA: non applicable, clinical failure < 12 months)

| Patient Code | Global Follow-up (month) | Clinical Success | Initial PAI score | Final PAI score | Global treatment success |
|--------------|--------------------------|------------------|-------------------|-----------------|--------------------------|
| P101         | 54                       | Yes              | 1                 | 1               | Yes                      |
| P102         | 54                       | Yes              | 1                 | 2               | Yes                      |
| P106         | 51                       | Yes              | 3                 | 4               | No                       |
| P104         | 50                       | Yes              | 3                 | 3               | Yes                      |
| P107         | 49                       | Yes              | 2                 | 3               | No                       |
| P108         | 47                       | Yes              | 1                 | 1               | Yes                      |
| P111         | 31                       | Yes              | 1                 | 2               | Yes                      |
| P113         | 29                       | Yes              | 1                 | 2               | Yes                      |
| P115         | 28                       | No               | 1                 | 3               | No                       |
| P116         | 27                       | Yes              | 1                 | 1               | Yes                      |
| P117         | 26                       | Yes              | 2                 | 3               | No                       |
| P118         | 26                       | Yes              | 2                 | 3               | No                       |
| P125         | 26                       | Yes              | 2                 | 2               | Yes                      |
| P123         | 25                       | Yes              | 2                 | 3               | No                       |
| P120         | 24                       | Yes              | 1                 | 3               | No                       |
| P128         | 17                       | Yes              | 3                 | 3               | Yes                      |
| P129         | 17                       | Yes              | 1                 | 1               | Yes                      |
| P131         | 17                       | Yes              | 2                 | 2               | Yes                      |

|      |    |     |   |    |     |
|------|----|-----|---|----|-----|
| P132 | 17 | Yes | 1 | 1  | Yes |
| P133 | 17 | Yes | 1 | 2  | Yes |
| P134 | 17 | Yes | 3 | 2  | Yes |
| P112 | 16 | No  | 3 | 5  | No  |
| P135 | 16 | Yes | 2 | 2  | Yes |
| P136 | 15 | Yes | 1 | 2  | Yes |
| P137 | 14 | Yes | 2 | 1  | Yes |
| P138 | 13 | Yes | 2 | 3  | No  |
| P141 | 13 | Yes | 4 | 2  | Yes |
| P139 | 12 | Yes | 3 | 3  | Yes |
| P140 | 12 | Yes | 4 | 3  | Yes |
| P130 | 9  | No  | 4 | NA | No  |
